# Supplementary material
Source: ML conference proceedings conference paper supplement (https://openaccess.thecvf.com/content/ICCV2025/html/Cao_IRGPT_Understanding_Real-world_ICCV_2025_paper.html)
Supplement: Supplementary file 1 [file Cao_IRGPT_Understanding_Real-world_ICCV_2025_supplemental.pdf]

# Supplementary Material for IRGPT: Understanding Infrared Modality with Cross-modal Curriculum on Real Infrared Image

Anonymous ICCV submission

Paper ID 361

## A. Benchmark Building Details

### A.1 Recognition, Scene and Security

The target category is extracted from labels and inserted as a key term into template sentences, while three distractor categories absent in the image are selected from the candidate set to form answer options. The distinctions between these three tasks manifest as follows:

- The **Recognition** task exclusively uses images containing a single target category, which serves as the correct answer.
- In the **Scene** task, each image is unambiguously associated with one scene category, emphasizing holistic image interpretation rather than individual object recognition.
- Conversely, the **Security** task requires selecting non-existent targets within the image, making its correct answers complementary to those in the Recognition task.

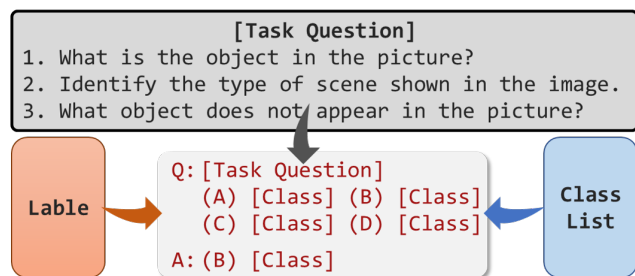

Figure 1: Recognition, Scene and Security task generation.

### A.2 Relationship

The positional relationship task serves as a binary judgment task focused on verifying the accuracy of spatial relationship descriptions. Our methodology addresses two primary challenges in generating positional relationships: 1) formulating precise descriptions between target objects, and 2) accurately localizing reference objects.

For the first challenge, we consider six fundamental spatial relations: left, right, far, near, front, and back. Left/right

relations are determined by comparing the horizontal positions of the centroids within predefined image regions, while front/back relations necessitate depth perception. To address this requirement, we integrate depth estimation through the MiDaS [?]. Near/far determinations combine 2D proximity in the image plane with depth proximity, applying empirically derived thresholds to classify relationships (far if exceeding threshold, near otherwise).

For the second problem, we adopt the same approach as Infrared-LLaVA [?], which involves left-to-right enumeration of same-category objects and designates the nth enumerated object as the reference target. The implementation framework is systematically illustrated in the accompanying figure.

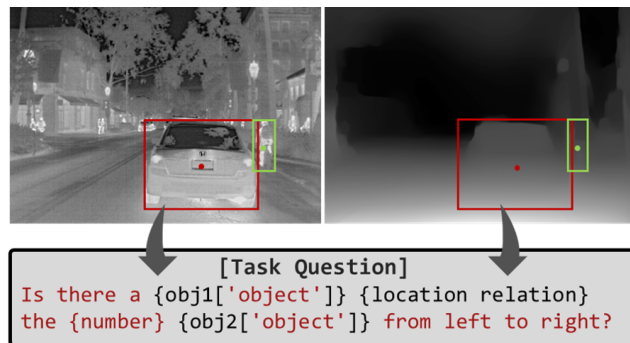

Figure 2: Relationship task generation.

### A.3 Grounding

The grounding task primarily focuses on establishing correspondence between descriptions and target objects. Due to the limited appearance features in infrared images compared to visible images (where characteristics like color patterns can be effectively utilized), we propose two distinct approaches for target description, as illustrated in our framework. Firstly, we employ absolute positional descriptions based on image coordinates. Secondly, we imple-

ment relative positional descriptions through spatial relationships, which shares methodological similarities with relationship reasoning tasks. The former approach specifically utilizes a nine-grid division scheme for systematic region-based characterization.

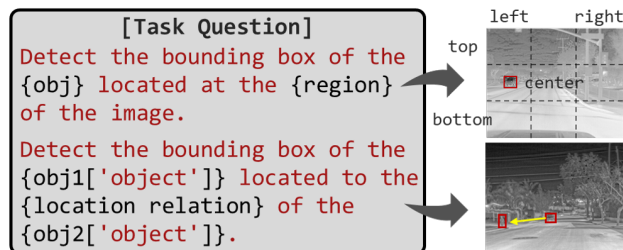

Figure 3: Grounding task generation.

#### A.4 Aerial Counting and Pedestrian Counting

Aerial Counting and Pedestrian Counting are two fundamental computer vision tasks focusing on estimating vehicle and pedestrian densities within images. The former operates on aerial perspectives captured by unmanned aerial vehicles (UAVs), while the latter analyzes surveillance camera viewpoints. Both methodologies have demonstrated significant practical utility in their respective operational domains, with Aerial Counting enabling large-scale traffic monitoring and Pedestrian Counting facilitating crowd management in urban surveillance systems.

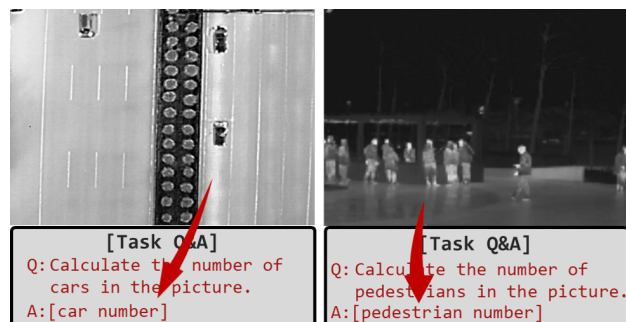

Figure 4: Aerial Counting and Pedestrian Counting task generation.

#### A.5 Location

The Location task is designed to determine the positional coordinates of targets within a specific category, constituting an advanced extension of the counting task. The spatial position of each target is operationally defined as the centroid coordinates of its corresponding bounding box (BBbox). A schematic representation of this implementation framework is illustrated in the accompanying figure below.

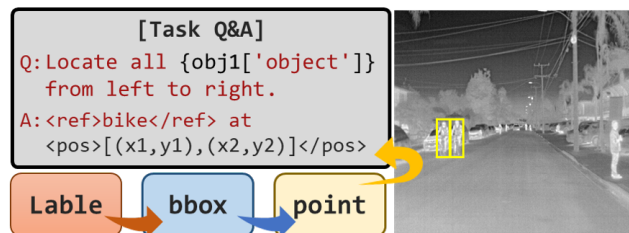

Figure 5: Location task generation.

#### A.6 Re-ID

The person re-identification (Re-ID) task represents one of the most prevalent applications in surveillance scenarios, aiming to verify whether individuals captured under different camera views share the same identity. In our experimental setup, we randomly sample eight pedestrian images and assemble them into a composite image, where only one instance matches the identity of the query image positioned at the top-left corner. This evaluation protocol essentially corresponds to measuring the Rank-1 accuracy rate, which serves as the primary performance metric. The detailed operational workflow is illustrated in Figure ??.

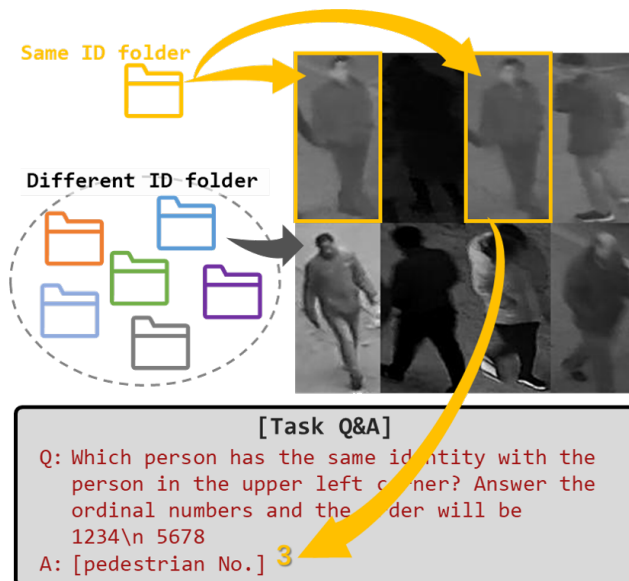

Figure 6: Re-ID task generation.

#### B. Caption after Low-light Enhancement

The low-light enhancement technique significantly alters the model's understanding of the scene by revealing previously obscured details and contextual relationships. In the original dim image, the model perceived a loosely organized parking lot with generic vehicle descriptions and no

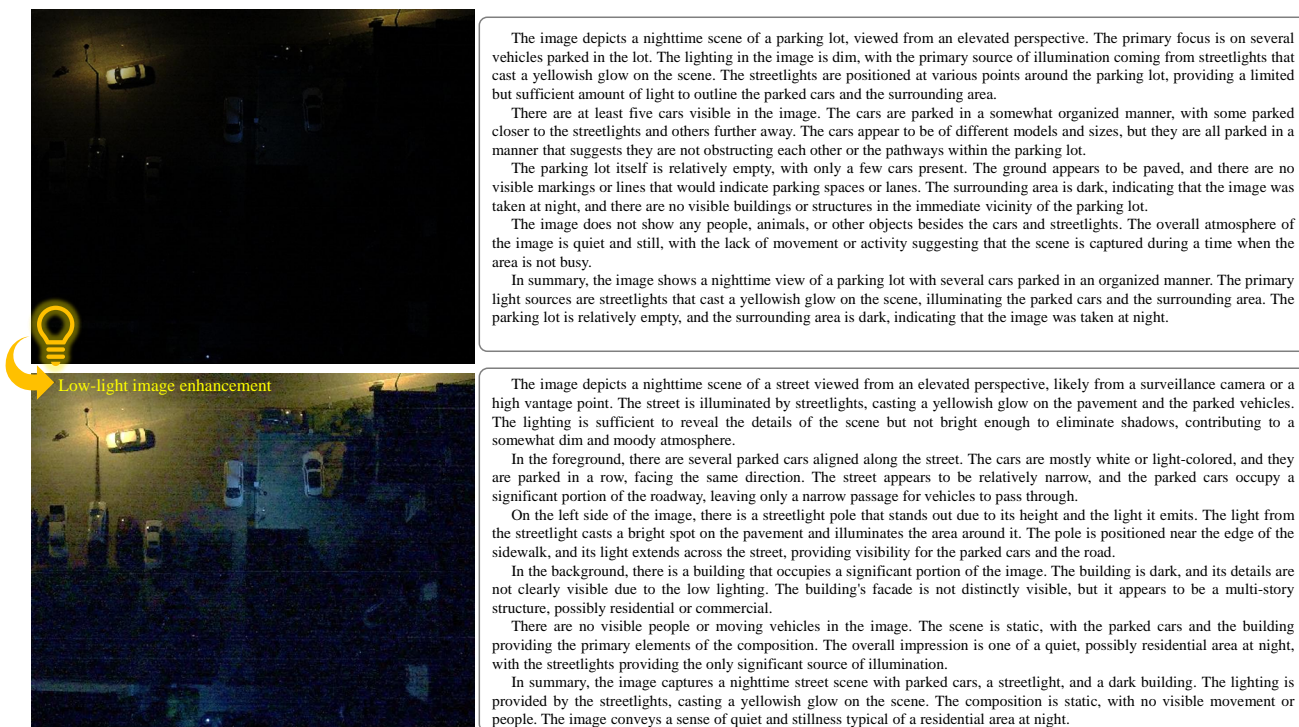

Figure 7: LLM outputs before and after low-light Enhancement.

background structures, constrained by limited visibility. After enhancement, the model identifies the scene as a narrow street with precise environmental cues: uniformly parked white vehicles, a multi-story building in the background, and directional lighting patterns from streetlamps. This transformation demonstrates how the enhancement amplifies subtle textures (e.g., car colors, architectural outlines) while preserving natural shadow dynamics, enabling the model to reconstruct spatial hierarchies (foreground vehicles vs. background structures) and recognize standardized urban layouts. Crucially, the technology balances brightness amplification with atmospheric authenticity – recovering actionable details like vehicle alignment for surveillance applications, yet retaining the scene’s nocturnal character through controlled contrast rather than artificial over-illumination.

### C. Training Loss

Here, we present the training loss trajectories with and without CL (Contrastive Learning), as illustrated in Figure ???. The CL framework demonstrates effective training stabilization, achieving rapid convergence to a lower loss plateau during the initial optimization phase. Notably, the CL-based training exhibits minimal loss fluctuations, demonstrating a marked contrast between the two optimization strategies.

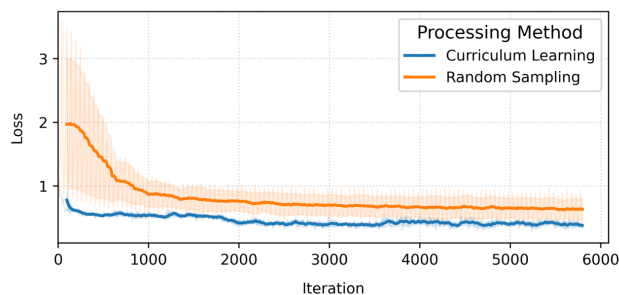

Figure 8: The curve of training loss.

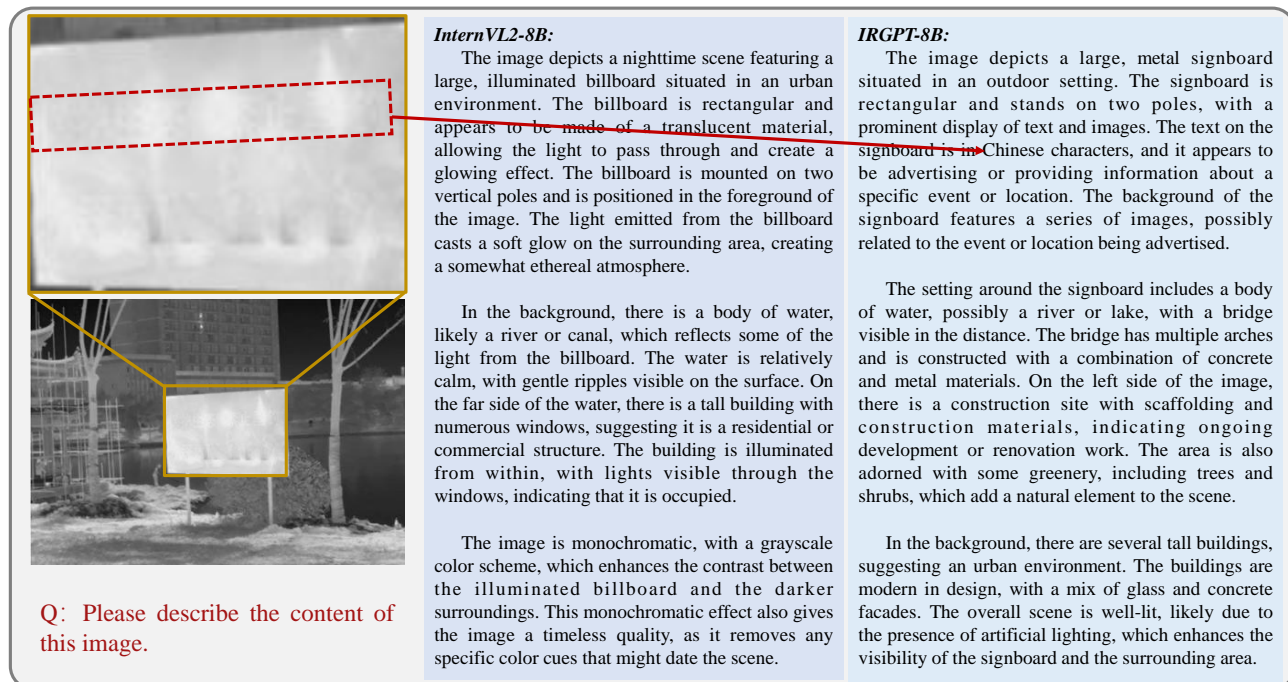

Figure 9: A comparative analysis of InternVL and IRGPT reveals that both models describe an identical image.

## D. Comparative Analysis of InternVL-8B and IRGPT-8B

As shown in Figure ??, the key distinction between the two descriptions lies in IRGPT-8B’s superior ability to interpret infrared-specific details due to its specialized pre-training. While InternVL2-8B misidentifies the metallic signboard as “translucent” and focuses on atmospheric effects (e.g., “ethereal glow”), IRGPT-8B accurately recognizes structural elements like the metal-concrete bridge, construction scaffolding, and Chinese text on the signboard, reflecting its domain-specific understanding of material properties, contextual activity (e.g., ongoing construction), and semantic content. This precision, rooted in infrared training, enables IRGPT-8B to deliver actionable insights for real-world applications such as urban monitoring or infrastructure analysis, where material accuracy and functional context are critical.

## E. Hyperparameter Sensitivity

As illustrated in Figure ??, we conduct an ablation study on the hyperparameter M (number of hierarchical layers in the sampling strategy). The experimental results demonstrate that setting M=10 achieves peak performance while obtaining favorable values for both psum and nsum metrics.

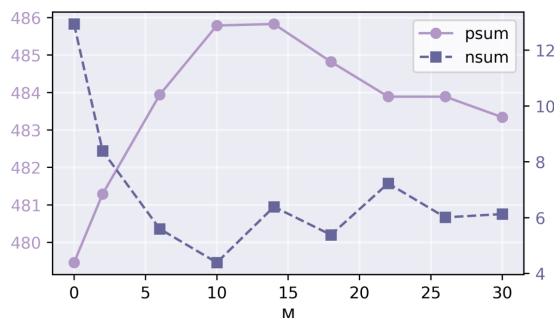

Figure 10: The curve of hyper-parameter ablation.

## F. Dataset Ratio of LLM-base and Rule-based

As depicted in Figure ??, we present the proportionate allocation between LLM-based and rule-based data sources.

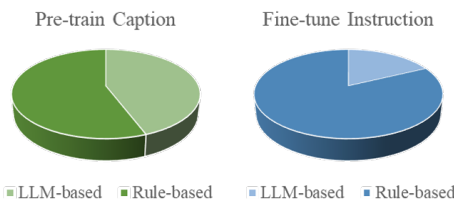

Figure 11: Dataset Ratio of LLM-base and Rule-based.



**Question:**  
Please give a caption in detail.

**Answer:**  
The image is an aerial view of a street scene. The street is divided into two lanes by a double yellow line, indicating that it is a two-way road. On the left side of the street, there is a sidewalk with a row of trees and a small garden area. The garden area has several plants and a small structure, possibly a shed or a small building. On the right side of the street, there is a parking area with several cars parked in various spots. The parking area is adjacent to a larger open space that appears to be a construction site or a vacant lot. There are some construction materials and equipment visible in this area. In the middle of the street, there are a few vehicles, including a car driving in the left lane and a few cars parked on the right side of the road. There are also a few pedestrians walking on the sidewalks. The overall scene suggests a quiet, possibly suburban or rural area with some ongoing construction or development.



**Question:**  
Please give a caption in detail.

**Answer:**  
The image depicts a nighttime street scene with several elements. In the foreground, there are two cars parked on the side of the road. The car on the left is a white sedan, and the car on the right is a silver sedan. Between these two cars, there is a bicycle parked against a tree. In the background, there are several people walking on the sidewalk. They appear to be engaged in conversation. Behind them, there are more trees and a building with a bright light shining from a window. The street is lined with trees, and there are power lines running across the image. The overall scene suggests a quiet urban area at night.



**Question:**  
What is the shape of the top of the valve?

**Answer:**  
The top of the valve is circular.



**Question:**  
What is the cat doing in the image?

**Answer:**  
The cat is sitting on the ground, facing towards the right side of the image.



**Question:**  
What can be inferred about the time of day in the image?

**Answer:**  
The image depicts a nighttime street scene.





**Question:**  
What time of day does the image likely depict?

**Answer:**  
The image likely depicts daytime, as indicated by the shadows cast by the trees and street furniture.



Figure 12: Some dialogue examples.

## G. Model Q/A Presentation

As demonstrated in the Figure ??, we present several dialogue examples of IRGPT, highlighting its robust image comprehension capabilities. The model accurately perceives small targets and subtle image details, exemplified by

the cat’s posture in the fourth example. Notably, IRGPT infers whether infrared images were captured during daytime or nighttime based on subtle cues, a task even challenging for human observers.

## H. Source Data Directory

Table 1: Source datasets in details.

| Index | Dataset name          | Data size |
|-------|-----------------------|-----------|
| 1     | LLVIP                 | 15.5K     |
| 2     | KAIST                 | 95.3K     |
| 3     | M3FD                  | 8.4K      |
| 4     | VEDAI                 | 1.2K      |
| 6     | LSOTB-TIR             | 643K      |
| 7     | RGBT234               | 234K      |
| 8     | LasHeR                | 734.8K    |
| 9     | VTUAV                 | 1.7M      |
| 10    | MFNet                 | 1.6K      |
| 11    | IRSTD-1k              | 1K        |
| 12    | SIRST-AUG             | 8.5K      |
| 13    | BU-TIV                | 60K       |
| 14    | VisDrone-DroneVehicle | 28.4K     |
| 16    | MassMIND              | 2.9K      |
| 17    | ISDD                  | 1.3K      |
| 18    | CDFAG                 | 88K       |
| 19    | WideIRSTD             | 9K        |
| 20    | DMIST                 | 9K        |
| 21    | JU-VNT                | 2.6K      |
| 22    | POP                   | 7.8K      |
| 23    | RGBTCrowdCounting     | 2K        |
| 24    | VT5000                | 5K        |
| 27    | Industry              | 0.4K      |
| 28    | VT1000                | 1K        |
| 29    | VT821                 | 821       |
| 30    | UVT2000               | 2K        |
| 31    | FLIR                  | 10K       |
| 32-50 | Web Data(several)     | 66K       |
| 51    | RGBNIR                | 1K        |
| 52    | UAV_RGB-T_2400        | 2.4K      |
| 53    | LLCM                  | 65.8K     |
| 54    | RegDB                 | 9K        |
| 55    | SYSU-MM01             | 47K       |
| 56    | ThermalWorld          | 8.1K      |
| 57    | solar_cell_EL_image   | 36.5K     |
| 58    | sirst_aug             | 18.1K     |
| 59    | tirsequences          | 30K       |
| 60    | DroneRGBT             | 7K        |
| 61    | UVT20K                | 20K       |
| 62    | time-sensitive        | 21.8K     |
| 63    | FLIR_ADAS             | 66.8K     |

## I. Extra Exploration

Table 2: Extra experiment of zero-shot case.

| Case                            | psum   | nsum   |
|---------------------------------|--------|--------|
| Pre-train on RGBT pairs (RGB)   | 310.54 | 102.69 |
| Pre-train on RGBT pairs (T)     | 319.39 | 98.40  |
| IRGPT-8B (main result in paper) | 328.65 | 93.87  |
| IRGPT-26B                       | 332.68 | 87.36  |

We supplement several special cases in Table ??.

First, for the subset of IR-TD data with corresponding visible-light images, we exclusively use their RGB versions for training and evaluation. Comparative experiments using only IR counterparts reveal that RGB-based training still contributes to performance improvement, potentially due to the closer distribution alignment between RGB and T-version images. However, T-version training outperforms RGB-based approaches while remaining inferior to full-scale pre-training results.

Furthermore, we investigate larger-scale models and observe significant improvements in evaluation metrics.

## J. Unaligned datasets

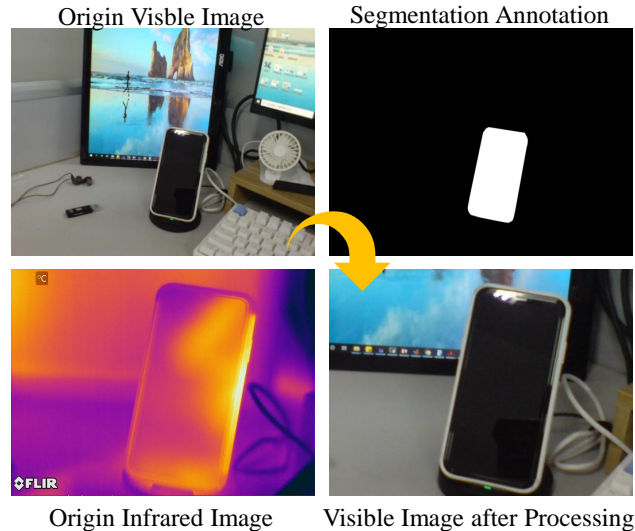

Figure 13: The processing of unaligned datasets.

We present our approach for handling unaligned RGB-T image pairs, which primarily leverages target annotations as anchor points to crop the wider field-of-view visible image, thereby ensuring semantic consistency within the image pair.

## References

- [1] Shixin Jiang, Zerui Chen, Jiafeng Liang, Yanyan Zhao, Ming Liu, and Bing Qin. Infrared-llava: Enhancing understanding of infrared images in multi-modal large language models. In *Findings of the Association for Computational Linguistics: EMNLP 2024*, pages 8573–8591, 2024.
- [2] René Ranftl, Katrin Lasinger, David Hafner, Konrad Schindler, and Vladlen Koltun. Towards robust monocular depth estimation: Mixing datasets for zero-shot cross-dataset transfer. *IEEE Transactions on Pattern Analysis and Machine Intelligence*, 44(3), 2022.
